# Supplementary material
Source: PubMed Central journal article supplement (PMC3326729)
Supplement: NIHMS47268-supplement-supp_data.pdf [file NIHMS47268-supplement-supp_data.pdf]

## SUPPORTING INFORMATION

**Title:** Bystander activation of iNKT cells occurs during conventional T cell alloresponses

**Authors:** Jukes, J-P <sup>1,2</sup>, Wood, K J <sup>1</sup>, Jones ND <sup>1</sup>

**Address:** <sup>1</sup>Transplantation Research Immunology Group, Nuffield Department of Surgical Sciences, University of Oxford, John Radcliffe Hospital, Headington, Oxford, UK. Tel: ++44 1865 221305 Fax: ++44 1865 788876

**Present Address:** <sup>2</sup>Medical Research Council Human Immunology Unit, Nuffield Department of Medicine, Weatherall Institute of Molecular Medicine, University of Oxford, Oxford, UK

**Correspondence to:** Dr Nick Jones ([nicholas.jones@nds.ox.ac.uk](mailto:nicholas.jones@nds.ox.ac.uk)) or Dr John-Paul Jukes ([john-paul.jukes@ndm.ox.ac.uk](mailto:john-paul.jukes@ndm.ox.ac.uk))

**Running Title:** Alloreactive T cells can mediate iNKT cell activation

**Keywords:** iNKT cells, Allorecognition, Bystander Activation, Transplantation

**Supporting Information:** 2 figures

## Supporting Figures

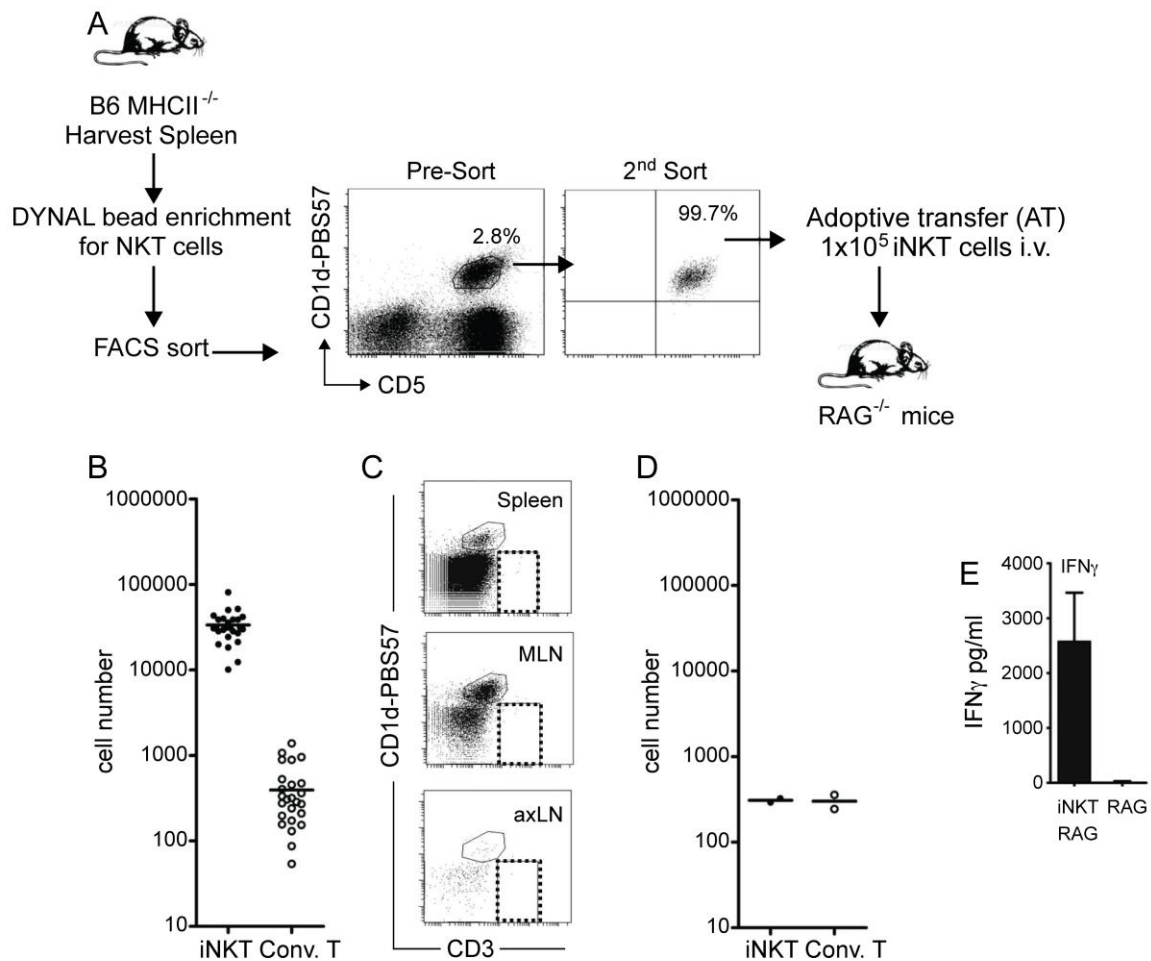

**S1. Experimental plan and analysis to generate iNKT-RAG mice.** MHCII<sup>-/-</sup> mice were used as a source of splenocytes and DYNAL enrichment for iNKT cells (A). iNKT cells were sorted and adoptively transferred into RAG<sup>-/-</sup> mice (B). Mice received either no  $\alpha$ -GalCer (n=2; D) or an injection of  $\alpha$ -GalCer on day+1 and +14 (n=27; B), relative to adoptive transfer. All mice were sacrificed 30-80 days after adoptive transfer and the spleen (B, D), mesenteric lymph node (C) and axillary lymph nodes (C) analysed for the presence of iNKT cells or conventional T cells. A cohort of iNKT-RAG were injected with  $\alpha$ -GalCer at day +30 and serum analysed for the presence of IFN<sub>γ</sub> 12 hours later (n=3, E). Dots represent individual animals (B/D). Data in E represented as the mean IFN<sub>γ</sub> concentration  $\pm$  s.d.

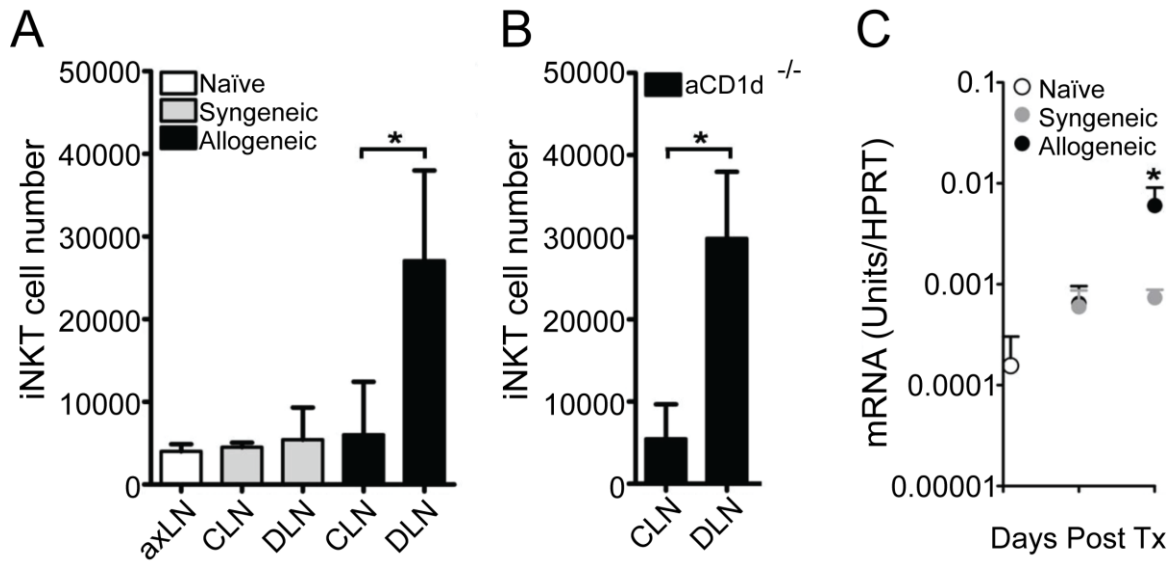

**S2. iNKT cells accumulate at sites of T cell priming following transplantation.**

iNKT cell (CD3<sup>+</sup>CD1d-PBS57<sup>+</sup>) numbers were assessed on day 10 following skin transplantation of syngeneic and allogeneic skin grafts in the draining axillary lymph node (DLN) and compared to those in the non-draining contralateral axillary lymph node (CLN) and untreated mice (axLN) by flow cytometry (n=3-5/group; A). The influence of allogeneic CD1d on iNKT cell recruitment was determined using skin grafts that lacked CD1d (n=3; aCD1d<sup>-/-</sup>) and the number of iNKT cells in the CLN and DLN assessed 10 days post transplant (B). The recruitment of iNKT cells to grafts following skin transplantation was determined using qRT-PCR on day 5 and 10 using syngeneic and allogeneic donors (n=3/group; C). Data in A and B shown as mean iNKT cell number  $\pm$  s.d. Data in C shown as the mean mRNA expression (Units/HPRT)  $\pm$  s.d. \* $p$ <0.05.
